# Supplementary material for: Validation of Novel Reference Genes for Reverse Transcription Quantitative Real-Time PCR in Drought-Stressed Sugarcane
Source: Hindawi journal article supplement (doi:10.1155/2014/357052), 2014-01-01
Supplement: f1 [file 357052.f1.pdf]

1 Supplementary Materials  
2

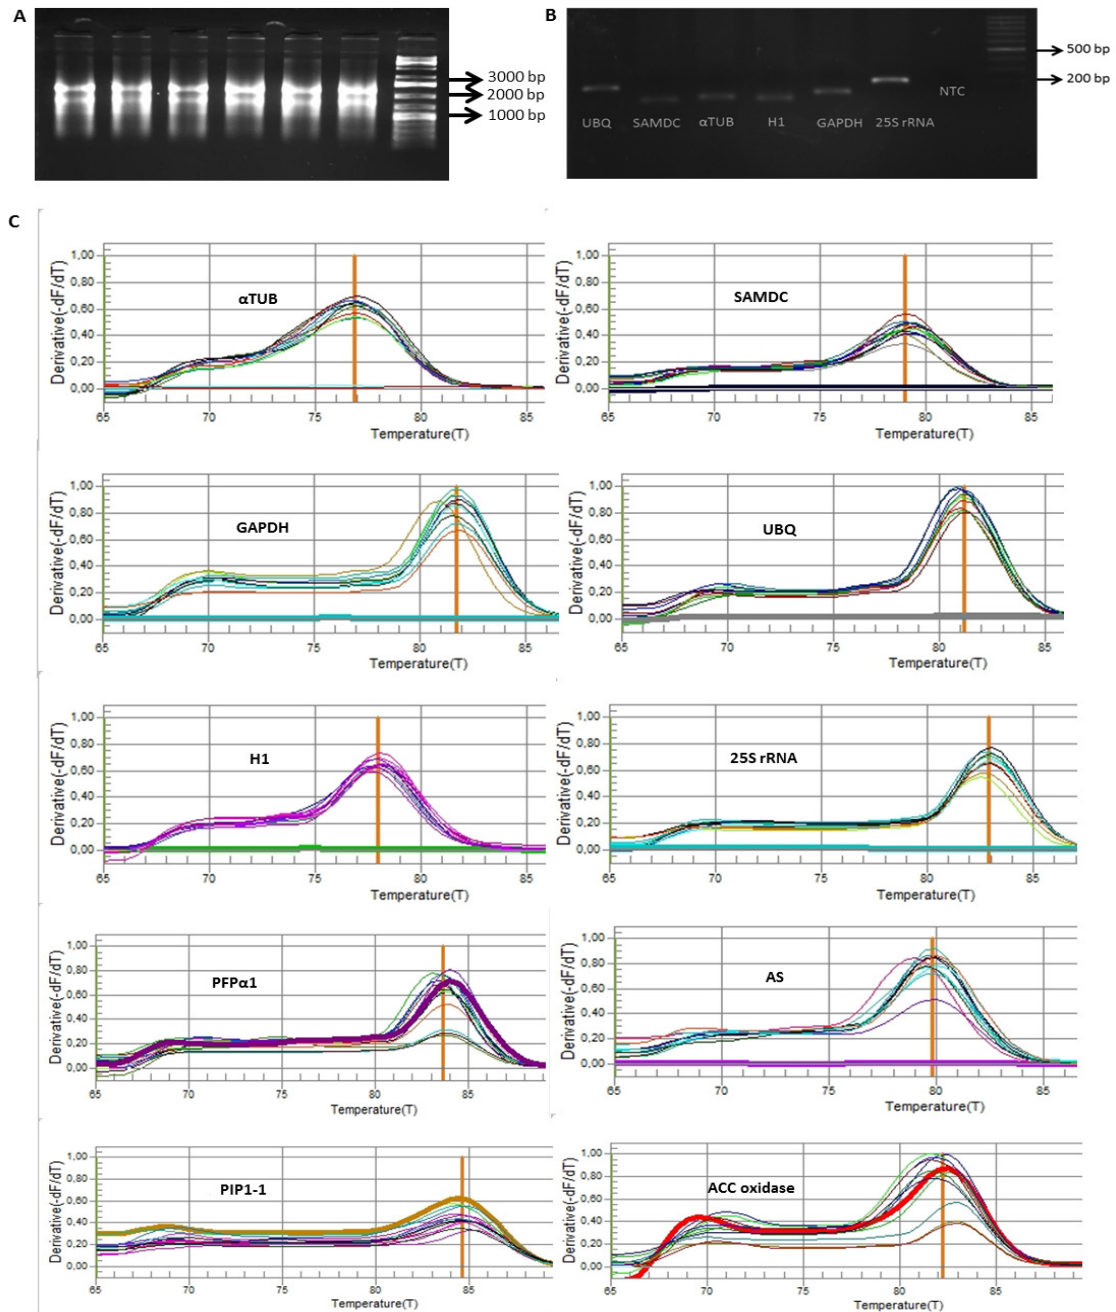

FIGURE S1: (A) Total RNA from sugarcane roots under drought stress treated with DNase. Thermo Scientific GeneRuler™ 1kb Ladder. (B) Agarose gel (1.5 %) showing the specific products of expected size for each gene, displaying primer specificity as required for RT-qPCR amplification. Thermo Scientific GeneRuler™ 100 pb DNA Ladder. (C) Melting curves showing a single peak for the candidate genes ( $\alpha$ TUB: Alpha-tubulin; GAPDH: Glyceraldehyde 3 phosphate dehydrogenase; H1: Histone H1; SAMDC: S-adenosylmethionine decarboxylase; UBQ: Ubiquitin; 25S rRNA: 25S ribosomal RNA) and targets (PFP $\alpha$ 1: Pyrophosphate fructose-6-phosphate 1-phosphotransferase alpha subunit; AS: Glutamine-dependent asparagine synthetase; PIP1-1: Plasma membrane intrinsic protein 1-1; ACC oxidase: 1-aminocyclopropane-1-carboxylate oxidase).

3  
4

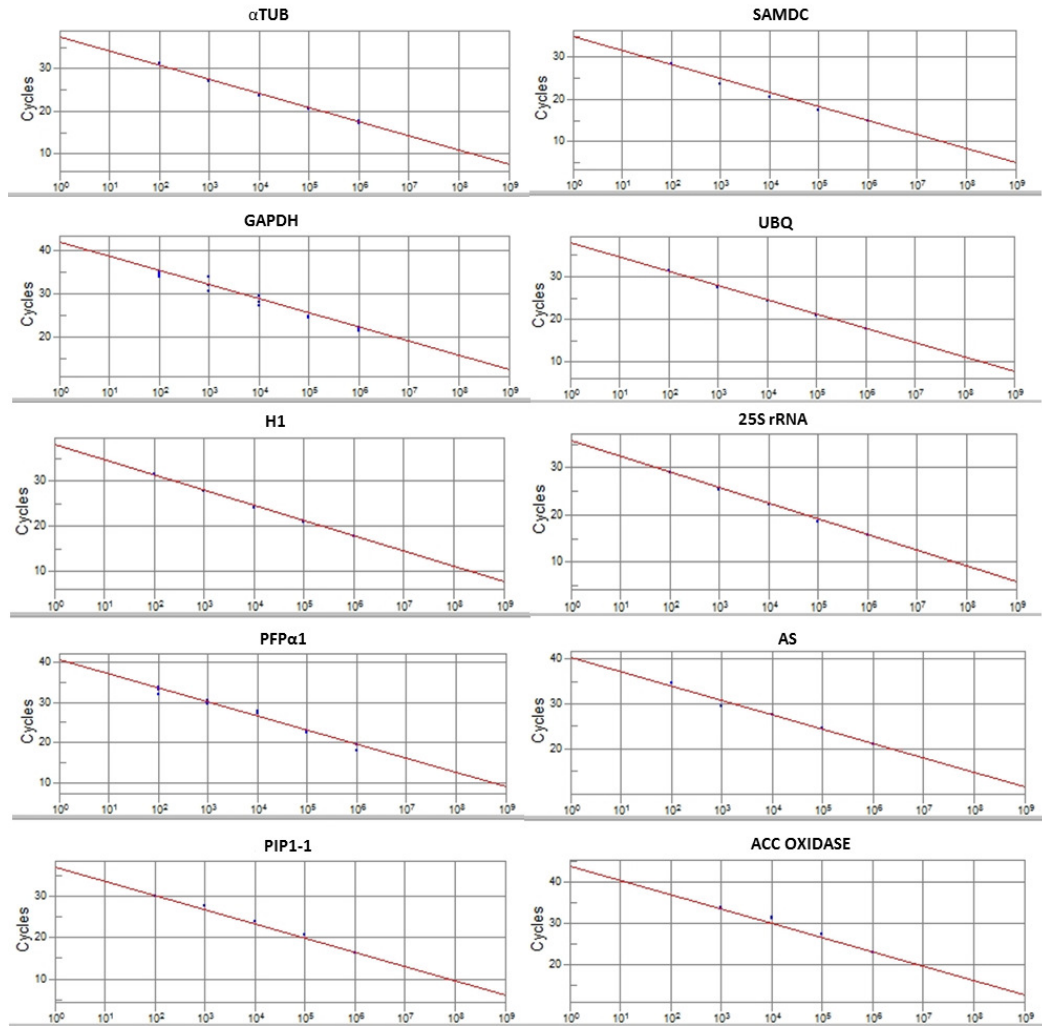

FIGURE S2: Standard curves using a dilution series (1, 10<sup>-1</sup>, 10<sup>-2</sup>, 10<sup>-3</sup> e 10<sup>-4</sup>) of potential reference genes for sugarcane roots under drought stress ( $\alpha$ TUB: Alpha-tubulin; GAPDH: Glyceraldehyde 3 phosphate dehydrogenase; H1: Histone H1; SAMDC: S-adenosylmethionine decarboxylase; UBQ: Ubiquitin; 25S rRNA: 25S ribosomal RNA) and the respective curves for targets (PFP $\alpha$ 1: Pyrophosphate fructose-6-phosphate 1-phosphotransferase alpha subunit; AS: Glutamine-dependent asparagine synthetase; PIP1-1: Plasma membrane intrinsic protein 1-1; ACC oxidase: 1-aminocyclopropane-1-carboxylate oxidase).

5  
6  
7  
8  
9  
10  
11  
12  
13  
14  
15  
16

17 TABLE S1. C<sub>q</sub> values of potential reference genes for gene expression normalization (RT-qPCR) with cDNAs  
 18 from sugarcane roots under drought stress (24 h of continuous dehydration).  
 19

| Sample* | $\alpha$ TUB | GAPDH | H1    | SAMDC | UBQ   | 25S rRNA |
|---------|--------------|-------|-------|-------|-------|----------|
| 1       | 27.18        | 23.89 | 25.56 | 22.43 | 23.70 | 14.85    |
| 2       | 28.00        | 23.51 | 24.42 | 22.00 | 24.55 | 14.46    |
| 3       | 27.96        | 23.97 | 24.67 | 23.22 | 25.66 | 13.88    |
| 4       | 27.47        | 23.48 | 24.94 | 22.03 | 24.21 | 14.29    |
| 5       | 27.15        | 23.78 | 24.48 | 22.05 | 25.11 | 14.61    |
| 6       | 27.38        | 23.10 | 25.14 | 22.17 | 25.19 | 14.53    |
| 7       | 27.41        | 23.91 | 24.38 | 23.47 | 24.07 | 13.43    |
| 8       | 27.19        | 24.23 | 24.55 | 24.24 | 24.52 | 13.21    |
| 9       | 27.71        | 24.23 | 24.97 | 23.49 | 23.74 | 13.68    |
| 10      | 27.08        | 23.29 | 24.54 | 22.47 | 24.88 | 13.06    |
| 11      | 27.23        | 23.47 | 24.71 | 22.62 | 24.88 | 13.48    |
| 12      | 28.00        | 23.39 | 24.77 | 22.73 | 25.11 | 14.54    |

20 \*1-3: bulk of tolerant genotypes without stress (control); 4-6: bulk of tolerant genotypes under stress; 7-9: bulk of sensitive  
 21 genotypes without stress (control); 10-12: bulk of sensitive genotypes under stress.  $\alpha$ TUB: Alpha-tubulin; GAPDH:  
 22 Glyceraldehyde 3 phosphate dehydrogenase; H1: Histone H1; SAMDC: S-adenosylmethionine decarboxylase; UBQ:  
 23 Ubiquitin; 25S rRNA: 25S ribosomal RNA.  
 24  
 25  
 26  
 27  
 28  
 29  
 30  
 31  
 32  
 33  
 34  
 35  
 36  
 37  
 38  
 39  
 40  
 41  
 42  
 43  
 44  
 45  
 46  
 47  
 48  
 49  
 50  
 51  
 52  
 53  
 54  
 55  
 56  
 57  
 58  
 59  
 60  
 61

TABLE S2: MIQE checklist for authors, reviewers, and editors (see reference [32])<sup>1</sup>.

|                                                                                   | IMPORTANCE     | Yes/No/NA* |
|-----------------------------------------------------------------------------------|----------------|------------|
| <b>Experimental design</b>                                                        |                |            |
| Definition of experimental and control groups                                     | E              | Yes        |
| Number within each group                                                          | E              | Yes        |
| Assay carried out by the core or investigator's laboratory?                       | D              | Yes        |
| Acknowledgment of authors' contributions                                          | D              | Yes        |
| <b>Sample</b>                                                                     |                |            |
| Description                                                                       | E              | Yes        |
| Volume/mass of sample processed                                                   | D              | Yes        |
| Microdissection or macrodissection                                                | E              | NA         |
| Processing procedure                                                              | E              | Yes        |
| If frozen, how and how quickly?                                                   | E              | Yes        |
| If fixed, with what and how quickly?                                              | E              | NA         |
| Sample storage conditions and duration (especially for FFPE <sup>2</sup> samples) | E              | Yes        |
| <b>Nucleic acid extraction</b>                                                    |                |            |
| Procedure and/or instrumentation                                                  | E              | Yes        |
| Name of kit and details of any modifications                                      | E              | Yes        |
| Source of additional reagents used                                                | D              | Yes        |
| Details of DNase or RNase treatment                                               | E              | Yes        |
| Contamination assessment (DNA or RNA)                                             | E              | Yes        |
| Nucleic acid quantification                                                       | E              | Yes        |
| Instrument and method                                                             | E              | Yes        |
| Purity (A260/A280)                                                                | D              | Yes        |
| Yield                                                                             | D              | No         |
| RNA integrity: method/instrument                                                  | E              | Yes        |
| RIN/RQI or Cq of 3_ and 5_ transcripts                                            | E              | NA         |
| Electrophoresis traces                                                            | D              | NA         |
| Inhibition testing (Cq dilutions, spike, or other)                                | E              | Yes        |
| <b>Reverse transcription</b>                                                      |                |            |
| Complete reaction conditions                                                      | E              | Yes        |
| Amount of RNA and reaction volume                                                 | E              | Yes        |
| Priming oligonucleotide (if using GSP) and concentration                          | E              | NA         |
| Reverse transcriptase and concentration                                           | E              | Yes        |
| Temperature and time                                                              | E              | Yes        |
| Manufacturer of reagents and catalogue numbers                                    | D              | Yes        |
| Cqs with and without reverse transcription                                        | D <sup>3</sup> | No         |
| Storage conditions of cDNA                                                        | D              | Yes        |
| <b>qPCR target information</b>                                                    |                |            |
| Gene symbol                                                                       | E              | Yes        |
| Sequence accession number                                                         | E              | Yes        |
| Location of amplicon                                                              | D              | Yes        |
| Amplicon length                                                                   | E              | Yes        |
| In silico specificity screen (BLAST, and so on)                                   | E              | Yes        |
| Pseudogenes, retropseudogenes, or other homologs?                                 | D              | NA         |
| Sequence alignment                                                                | D              | No         |
| Secondary structure analysis of amplicon                                          | D              | No         |
| Location of each primer by exon or intron (if applicable)                         | E              | Yes        |
| What splice variants are targeted?                                                | E              | NA         |
| <b>qPCR oligonucleotides</b>                                                      |                |            |
| Primer sequences                                                                  | E              | Yes        |
| RTPrimerDB identification number                                                  | D              | No         |
| Probe sequences                                                                   | D <sup>4</sup> | NA         |
| Location and identity of any modifications                                        | E              | No         |
| Manufacturer of oligonucleotides                                                  | D              | Yes        |
| Purification method                                                               | D              | Yes        |

Table S2. *Cont.*

| <b>qPCR protocol</b>                                                     |   |     |
|--------------------------------------------------------------------------|---|-----|
| Complete reaction conditions                                             | E | Yes |
| Reaction volume and amount of cDNA/DNA                                   | E | Yes |
| Primer, (probe), Mg <sup>2+</sup> , and dNTP concentrations              | E | Yes |
| Polymerase identity and concentration                                    | E | Yes |
| Buffer/kit identity and manufacturer                                     | E | Yes |
| Exact chemical composition of the buffer                                 | D | Yes |
| Additives (SYBR Green I, DMSO, and so forth)                             | E | Yes |
| Manufacturer of plates/tubes and catalog number                          | D | Yes |
| Complete thermocycling parameters                                        | E | Yes |
| Reaction setup (manual/robotic)                                          | D | Yes |
| Manufacturer of qPCR instrument                                          | E | Yes |
| <b>qPCR validation</b>                                                   |   |     |
| Evidence of optimization (from gradients)                                | D | No  |
| Specificity (gel, sequence, melt, or digest)                             | E | Yes |
| For SYBR Green I, C <sub>q</sub> of the NTC                              | E | Yes |
| Calibration curves with slope and y intercept                            | E | Yes |
| PCR efficiency calculated from slope                                     | E | Yes |
| CIs for PCR efficiency or SE                                             | D | No  |
| r <sup>2</sup> of calibration curve                                      | E | Yes |
| Linear dynamic range                                                     | E | NA  |
| C <sub>q</sub> variation at LOD                                          | E | NA  |
| CIs throughout range                                                     | D | NA  |
| Evidence for LOD                                                         | E | NA  |
| If multiplex, efficiency and LOD of each assay                           | E | NA  |
| <b>Data analysis</b>                                                     |   |     |
| qPCR analysis program (source, version)                                  | E | Yes |
| Method of C <sub>q</sub> determination                                   | E | Yes |
| Outlier identification and disposition                                   | E | Yes |
| Results for NTCs                                                         | E | Yes |
| Justification of number and choice of reference genes                    | E | Yes |
| Description of normalization method                                      | E | Yes |
| Number and concordance of biological replicates                          | D | Yes |
| Number and stage (reverse transcription or qPCR) of technical replicates | E | Yes |
| Repeatability (intraassay variation)                                     | E | Yes |
| Reproducibility (interassay variation, CV)                               | D | Yes |
| Power analysis                                                           | D | Yes |
| Statistical methods for results significance                             | E | Yes |
| Software (source, version)                                               | E | Yes |
| C <sub>q</sub> or raw data submission with RDML                          | D | No  |

64 \*Not Applicable; <sup>1</sup>All essential information (E) must be submitted with the manuscript. Desirable information (D) should be  
65 submitted if available. If primers are from RTPrimerDB, information on qPCR target, oligonucleotides, protocols, and validation  
66 is available from that source; <sup>2</sup>FFPE, formalin-fixed, paraffin-embedded; RIN, RNA integrity number; RQI, RNA quality  
67 indicator; GSP, gene-specific priming; dNTP, deoxynucleoside triphosphate; <sup>3</sup>Assessing the absence of DNA with a no-reverse  
68 transcription assay is essential when first extracting RNA. Once the sample has been validated as DNA free, inclusion of a no-  
69 reverse transcription control is desirable but no longer essential; <sup>4</sup>Disclosure of the probe sequence is highly desirable and  
70 strongly encouraged; however, because not all vendors of commercial predesigned assays provide this information, it cannot be  
71 an essential requirement. Use of such assays is discouraged.

72
